# Supplementary material for: Dual effects of cardamonin/alpinetin and their acrolein adducts on scavenging acrolein and the anti-bacterial activity from Alpinia katsumadai Hayata as a spice in roasted meat
Source: Royal Society of Chemistry journal article supplement (doi:10.1039/d2fo00100d), 2022-01-01

Supplementary information

**Dual effects of cardamomin/alpinetin and their acrolein adducts on scavenging acrolein and anti-bacteria from *Alpinia katsumadai* Hayata as a spice in roasted meat**

Yang Lu,<sup>a</sup> Juan Liu,<sup>a</sup> Jiaqi Tong,<sup>a</sup> Chenxiao Zhang,<sup>a</sup> Yi Duan,<sup>a</sup> Xiaoli Song,<sup>a</sup> Yongling Lu,<sup>a</sup> Lishuang Lv<sup>a\*</sup>

<sup>a</sup>Department of Food Science and Technology, School of Food Science and Pharmaceutical Engineering, Nanjing Normal University, 2 Xuelin Road, Nanjing, Jiangsu 210023, People's Republic of China

Corresponding author: Dr. Lishuang Lv, Telephone/Fax: +86 25-85898183; E-mail address: lishuanglv@126.com;

lulishuang@njnu.edu.cn

## Supplementary Information

**Table S1** Quantification of CAR and ALP by reacting at different temperatures for 60 min. <sup>a</sup>

| Transformation | Compound | Concentration and proportion | Temperature (°C) |                |               |               |                |
|----------------|----------|------------------------------|------------------|----------------|---------------|---------------|----------------|
|                |          |                              | 37               | 60             | 80            | 100           | 120            |
| CAR            | CAR      | Concentration (mmol/L)       | 4.937 ± 0.077    | 4.487 ± 0.1841 | 4.004 ± 0.205 | 2.817 ± 0.188 | 2.139 ± 0.106  |
|                |          | Conversion rate (%)          | 1.26 ± 1.54      | 10.26 ± 3.68   | 19.92 ± 4.1   | 43.65 ± 3.76  | 57.22 ± 2.12   |
| ↓              | ALP      | Concentration (mmol/L)       | 0.066 ± 0.015    | 0.489 ± 0.012  | 0.945 ± 0.036 | 2.151 ± 0.145 | 2.967 ± 0.1376 |
| ALP            |          | Yield (%)                    | 1.32 ± 0.3       | 9.78 ± 0.24    | 18.9 ± 0.72   | 43.02 ± 2.90  | 59.34 ± 2.75   |
|                |          | Deviation rate (%)           | 4.76             | -4.68          | -5.12         | -1.44         | 3.70           |
| ALP            | ALP      | Concentration (mmol/L)       | 4.959 ± 0.036    | 4.803 ± 0.158  | 4.204 ± 0.151 | 3.631 ± 0.22  | 2.850 ± 0.158  |
|                |          | Conversion rate (%)          | 0.82 ± 0.72      | 3.94 ± 3.16    | 15.92 ± 3.08  | 27.38 ± 4.40  | 43.00 ± 3.16   |
| ↓              | CAR      | Concentration (mmol/L)       | 0.042 ± 0.009    | 0.205 ± 0.036  | 0.753 ± 0.310 | 1.340 ± 0.141 | 2.057 ± 0.156  |
| CAR            |          | Yield (%)                    | 0.84 ± 0.18      | 4.10 ± 0.72    | 15.06 ± 6.20  | 26.80 ± 2.82  | 41.14 ± 3.12   |
|                |          | Deviation rate (%)           | -2.44            | 4.06           | -5.40         | -2.12         | -4.33          |

<sup>a</sup>The results are expressed as mean ± standard deviation.

**Table S2** Quantification of CAR and ALP by reacting at different pH for 30 min. <sup>a</sup>

| Transformation | Compound | Concentration and proportion | pH            |               |               |               |
|----------------|----------|------------------------------|---------------|---------------|---------------|---------------|
|                |          |                              | 5             | 6             | 7             | 8             |
| CAR            | CAR      | Concentration (mmol/L)       | 4.479 ± 0.195 | 4.233 ± 0.397 | 3.791 ± 0.023 | 3.333 ± 0.415 |
|                |          | Conversion rate (%)          | 10.42 ± 3.9   | 15.34 ± 7.94  | 24.18 ± 0.46  | 33.33 ± 8.3   |
| ↓              | ALP      | Concentration (mmol/L)       | 0.494 ± 0.026 | 0.728 ± 0.323 | 1.263 ± 0.179 | 1.750 ± 0.31  |
| ALP            |          | Yield (%)                    | 9.88 ± 0.52   | 14.56 ± 6.46  | 25.26 ± 3.58  | 35.00 ± 6.2   |
|                |          | Deviation rate (%)           | -5.18         | -5.08         | 1.08          | 5.01          |
|                |          | Concentration (mmol/L)       | 4.593 ± 0.089 | 4.389 ± 0.238 | 4.297 ± 0.215 | 3.785 ± 0.316 |
| ALP            | ALP      | Conversion rate (%)          | 8.14 ± 1.78   | 12.22 ± 4.76  | 14.06 ± 4.30  | 24.29 ± 6.32  |
| ↓              | CAR      | Concentration (mmol/L)       | 0.391 ± 0.027 | 0.584 ± 0.083 | 0.659 ± 0.208 | 1.246 ± 0.306 |
| CAR            |          | Yield (%)                    | 7.82 ± 0.54   | 11.68 ± 1.66  | 13.58 ± 4.16  | 24.92 ± 6.12  |
|                |          | Deviation rate (%)           | -3.93         | -4.419        | -3.41         | 2.59          |

<sup>a</sup>The results are expressed as mean ± standard deviation.

**Table S3**  $^1\text{H}$  (400 MHz) and  $^{13}\text{C}$  (100 MHz) data of ALP and ALP-ACR

|    | ALP                                                         |                                       | ALP-ACR                                         |                                       |
|----|-------------------------------------------------------------|---------------------------------------|-------------------------------------------------|---------------------------------------|
|    | $\delta_{\text{H}}$<br>$\delta$ (ppm), $J$ (Hz)             | $\delta_{\text{C}}$<br>$\delta$ (ppm) | $\delta_{\text{H}}$<br>$\delta$ (ppm), $J$ (Hz) | $\delta_{\text{C}}$<br>$\delta$ (ppm) |
| 1  | -                                                           | -                                     | -                                               | -                                     |
| 2  | 5.49 (dd, $J = 12.4$ )                                      | 78.51                                 | 5.56 (d, $J = 3.3$ )                            | 78.14/78.32                           |
| 3  | 2.62 (dd, $J = 16.4, 3.1$ )<br>2.99 (dd, $J = 16.4, 12.4$ ) | 45.31                                 | 2.81 (m)                                        | 45.07                                 |
| 4  | -                                                           | 187.84                                | -                                               | 188.39/188.34                         |
| 5  | -                                                           | 164.51                                | -                                               | 160.15                                |
| 6  | 6.08 (d, $J = 2.2$ )                                        | 96.09                                 | 6.07 (s)                                        | 94.17/94.13                           |
| 7  | -                                                           | 164.83                                | -                                               | 161.02                                |
| 8  | 6.01 (d, $J = 2.1$ Hz)                                      | 93.80                                 | -                                               | 102.95/102.91                         |
| 9  | -                                                           | 162.68                                | -                                               | 159.49/159.41                         |
| 10 | -                                                           | 104.94                                | -                                               | 105.5                                 |
| 11 | 3.74 (s)                                                    | 56.09                                 | 3.73 (s)                                        | 56.12                                 |
| 12 | -                                                           | -                                     | 2.54 (d, $J = 7.2$ )                            | 15.45/15.09                           |
| 13 | -                                                           | -                                     | 1.84 (m)                                        | 27.24/27.07                           |
| 14 | -                                                           | -                                     | 5.53 (t, $J = 5.1$ )                            | 93.15/92.90                           |
| 1' | -                                                           | 139.63                                | -                                               | 139.77/139.74                         |
| 2' | 7.44 (m)                                                    | 126.92                                | 7.42 (m)                                        | 126.62                                |
| 3' | 7.44 (m)                                                    | 128.98                                | 7.42 (m)                                        | 129.02                                |
| 4' | 7.44 (m)                                                    | 128.80                                | 7.42 (m)                                        | 128.69                                |
| 5' | 7.44 (m)                                                    | 128.98                                | 7.42 (m)                                        | 129.02                                |
| 6' | 7.44 (m)                                                    | 126.92                                | 7.42 (m)                                        | 126.60                                |

**Table S4**  $^1\text{H}$  (400 MHz) and  $^{13}\text{C}$  (100 MHz) data of CAR, CAR-ACR-1 and CAR-ACR-2

|    | CAR                                             |                                       | CAR-ACR-1                                       |                                       | CAR-ACR-2                                       |                                       |
|----|-------------------------------------------------|---------------------------------------|-------------------------------------------------|---------------------------------------|-------------------------------------------------|---------------------------------------|
|    | $\delta_{\text{H}}$<br>$\delta$ (ppm), $J$ (Hz) | $\delta_{\text{C}}$<br>$\delta$ (ppm) | $\delta_{\text{H}}$<br>$\delta$ (ppm), $J$ (Hz) | $\delta_{\text{C}}$<br>$\delta$ (ppm) | $\delta_{\text{H}}$<br>$\delta$ (ppm), $J$ (Hz) | $\delta_{\text{C}}$<br>$\delta$ (ppm) |
| 1  | -                                               | -                                     | -                                               | -                                     | -                                               | -                                     |
| 2  | 7.85 (d, $J = 15.7$ )                           | 142.28                                | 7.74 (m)                                        | 142.55                                | 6.59 (s)                                        | 90.48/90.33                           |
| 3  | 7.71 (m)                                        | 130.80                                | 7.74 (m)                                        | 130.90                                | 6.65 (dd, $J = 16.1, 3.8$ )                     | 118.07                                |
| 4  | -                                               | 192.23                                | -                                               | 192.51                                | -                                               | 165.32                                |
| 5  | -                                               | 163.18                                | -                                               | 161.07                                | -                                               | 156.04                                |
| 6  | 6.05 (d, $J = 2.2$ )                            | 92.15                                 | 6.03 (s)                                        | 92.45                                 | 6.03 (s)                                        | 93.30                                 |
| 7  | -                                               | 166.82                                | -                                               | 160.53                                | -                                               | 152.25/152.33                         |
| 8  | 5.96 (d, $J = 2.1$ )                            | 96.32                                 | -                                               | 102.98                                | -                                               | 102.93/102.88                         |
| 9  | -                                               | 165.56                                | -                                               | 164.49                                | -                                               | 149.28/149.34                         |
| 10 | -                                               | 105.59                                | -                                               | 105.51                                | -                                               | 102.39                                |
| 11 | 3.90 (s)                                        | 56.50                                 | 3.90 (s)                                        | 56.62                                 | 3.72 (s)                                        | 55.78                                 |
| 12 | -                                               | -                                     | 2.55 (d, $J = 6.8$ )                            | 14.90                                 | 2.65 (m)/2.44 (t, $J = 6.8$ )                   | 14.06/15.42                           |
| 13 | -                                               | -                                     | 1.86 (s)                                        | 27.22                                 | 1.95 (s)/2.11 (s)                               | 27.55/24.53                           |
| 14 | -                                               | -                                     | 5.54 (m)                                        | 93.26                                 | 5.38 (s)                                        | 92.08/91.89                           |
| 1' | -                                               | 135.40                                | -                                               | 135.37                                | -                                               | 134.30                                |
| 2' | 7.71 (m)                                        | 128.87                                | 7.74 (m)                                        | 128.93                                | 7.74 (m)                                        | 129.05                                |
| 3' | 7.46 (m)                                        | 129.52                                | 7.46 (dd, $J = 5.1, 2.0$ )                      | 129.56                                | 7.41 (m)                                        | 129.36                                |
| 4' | 7.46 (m)                                        | 127.96                                | 7.94 (d, $J = 15.7$ )                           | 127.77                                | 7.74 (m)                                        | 131.17                                |
| 5' | 7.46 (m)                                        | 129.52                                | 7.46 (dd, $J = 5.1, 2.0$ )                      | 129.56                                | 7.41 (m)                                        | 129.36                                |
| 6' | 7.71 (m)                                        | 128.87                                | 7.74 (m)                                        | 128.93                                | 7.74 (m)                                        | 129.05                                |

## Figure captions:

Fig. S1 ESI-MS<sup>1</sup> and MS<sup>2</sup> (positive ion) spectra of (A) CAR, (B) CAR-ACR-1, (C) CAR-ACR-2, (D) CAR-2ACR, (E) ALP, (F) ALP-ACR and (G) ALP-2ACR.

Fig. S2 High-resolution mass spectrum (MS<sup>1</sup> and MS<sup>2</sup>) of ALP-ACR

Fig. S3 <sup>1</sup>H-NMR spectrum of ALP-ACR

Fig. S4 <sup>13</sup>C-NMR spectrum of ALP-ACR

Fig. S5 HSQC-NMR spectrum of ALP-ACR

Fig. S6 HMBC-NMR spectrum of ALP-ACR

Fig. S7 High-resolution mass spectrum (MS<sup>1</sup> and MS<sup>2</sup>) of CAR-ACR-1

Fig. S8 <sup>1</sup>H-NMR spectrum of CAR-ACR-1

Fig. S9 <sup>13</sup>C-NMR spectrum of CAR-ACR-1

Fig. S10 HSQC-NMR spectrum of CAR-ACR-1

Fig. S11 HMBC-NMR spectrum of CAR-ACR-1

Fig. S12 High-resolution mass spectrum (MS<sup>1</sup> and MS<sup>2</sup>) of CAR-ACR-2

Fig. S13 <sup>1</sup>H-NMR spectrum of CAR-ACR-2

Fig. S14 <sup>13</sup>C-NMR spectrum of CAR-ACR-2

Fig. S15 HSQC-NMR spectrum of CAR-ACR-2

Fig. S16 HMBC-NMR spectrum of CAR-ACR-2

Fig. S17 DEPT-NMR spectrum of CAR-ACR-2

Fig. S18 HPLC-DAD chromatograms of (A) quercetin and (B) myricetin incubated at 100 °C for 0, 5, 15, 60 and 120 min in PBS (0.1M, pH 7.0)

Fig. S19 HPLC-DAD chromatograms of (A) ALP-ACR and (B) CAR-ACR-1 incubated at 100 °C for 0, 5, 15, 60 and 120 min in PBS (pH 7.0).

Fig. S1 ESI-MS<sup>1</sup> and MS<sup>2</sup> (positive ion) spectra of (A) CAR, (B) CAR-ACR-1, (C) CAR-ACR-2, (D) CAR-2ACR, (E) ALP, (F) ALP-ACR and (G) ALP-2ACR.

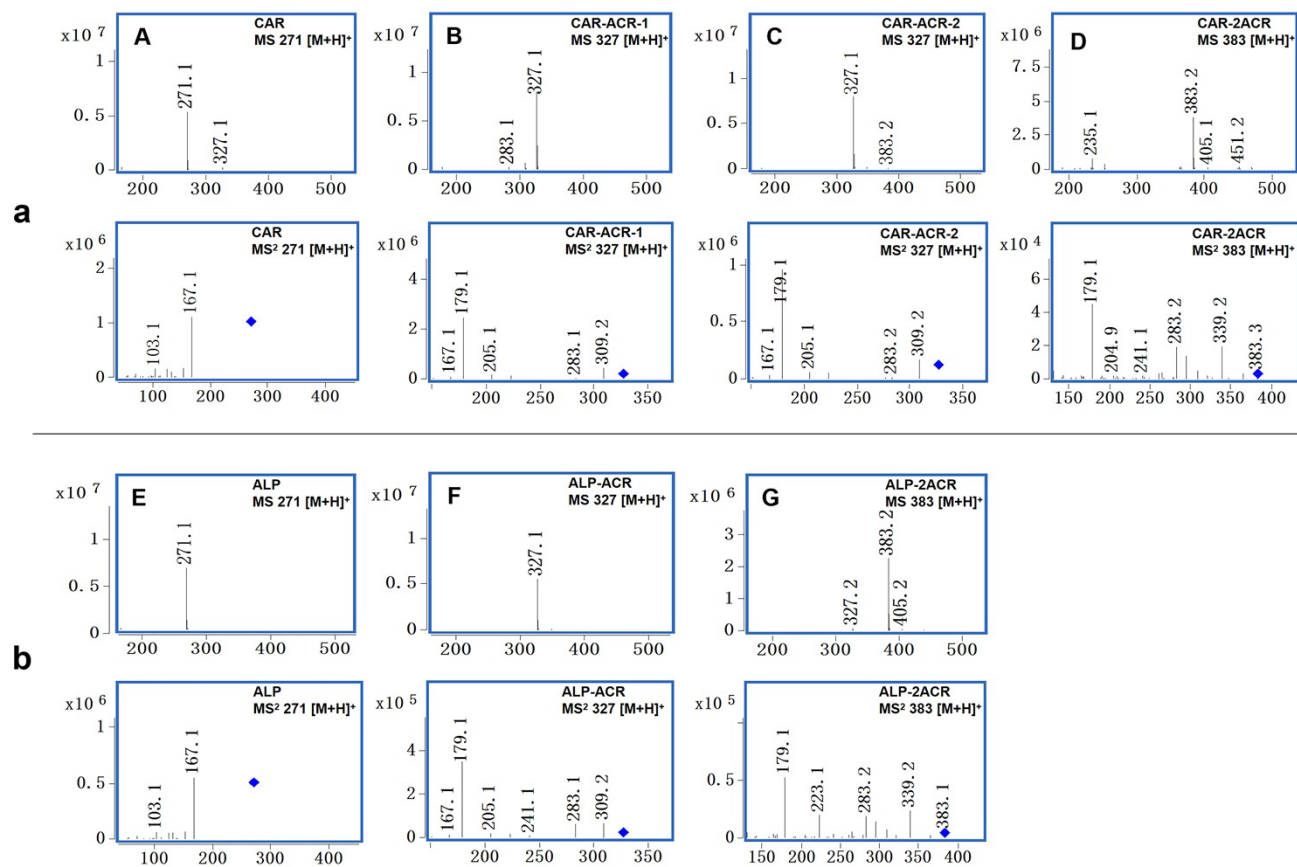



Fig. S2 High-resolution mass spectrum (MS<sup>1</sup> and MS<sup>2</sup>) of ALP-ACR

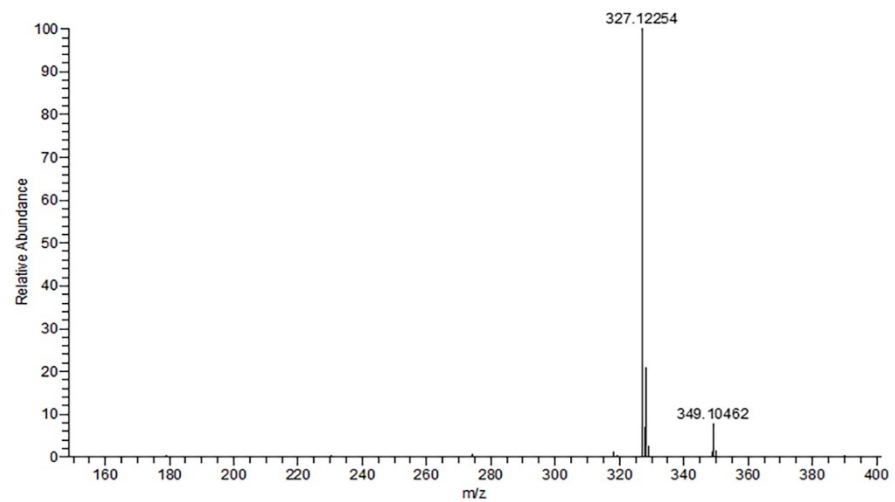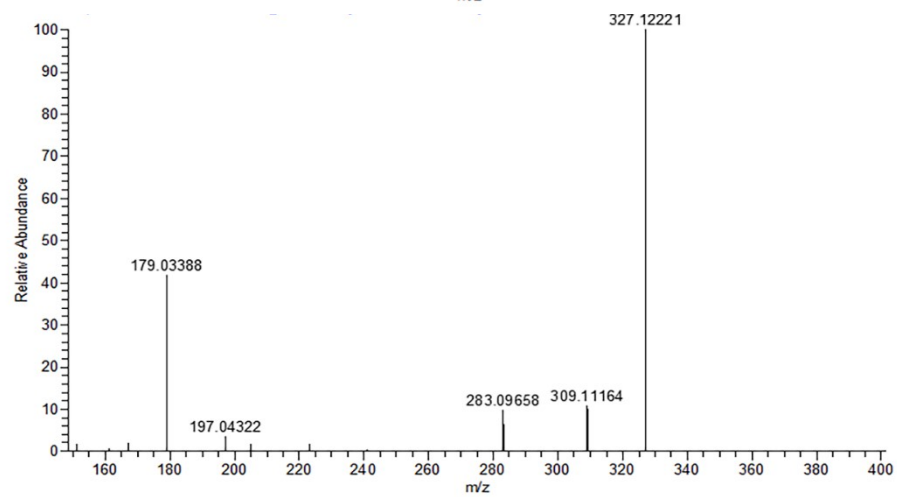

Fig. S3  $^1\text{H}$ -NMR spectrum of ALP-ACR

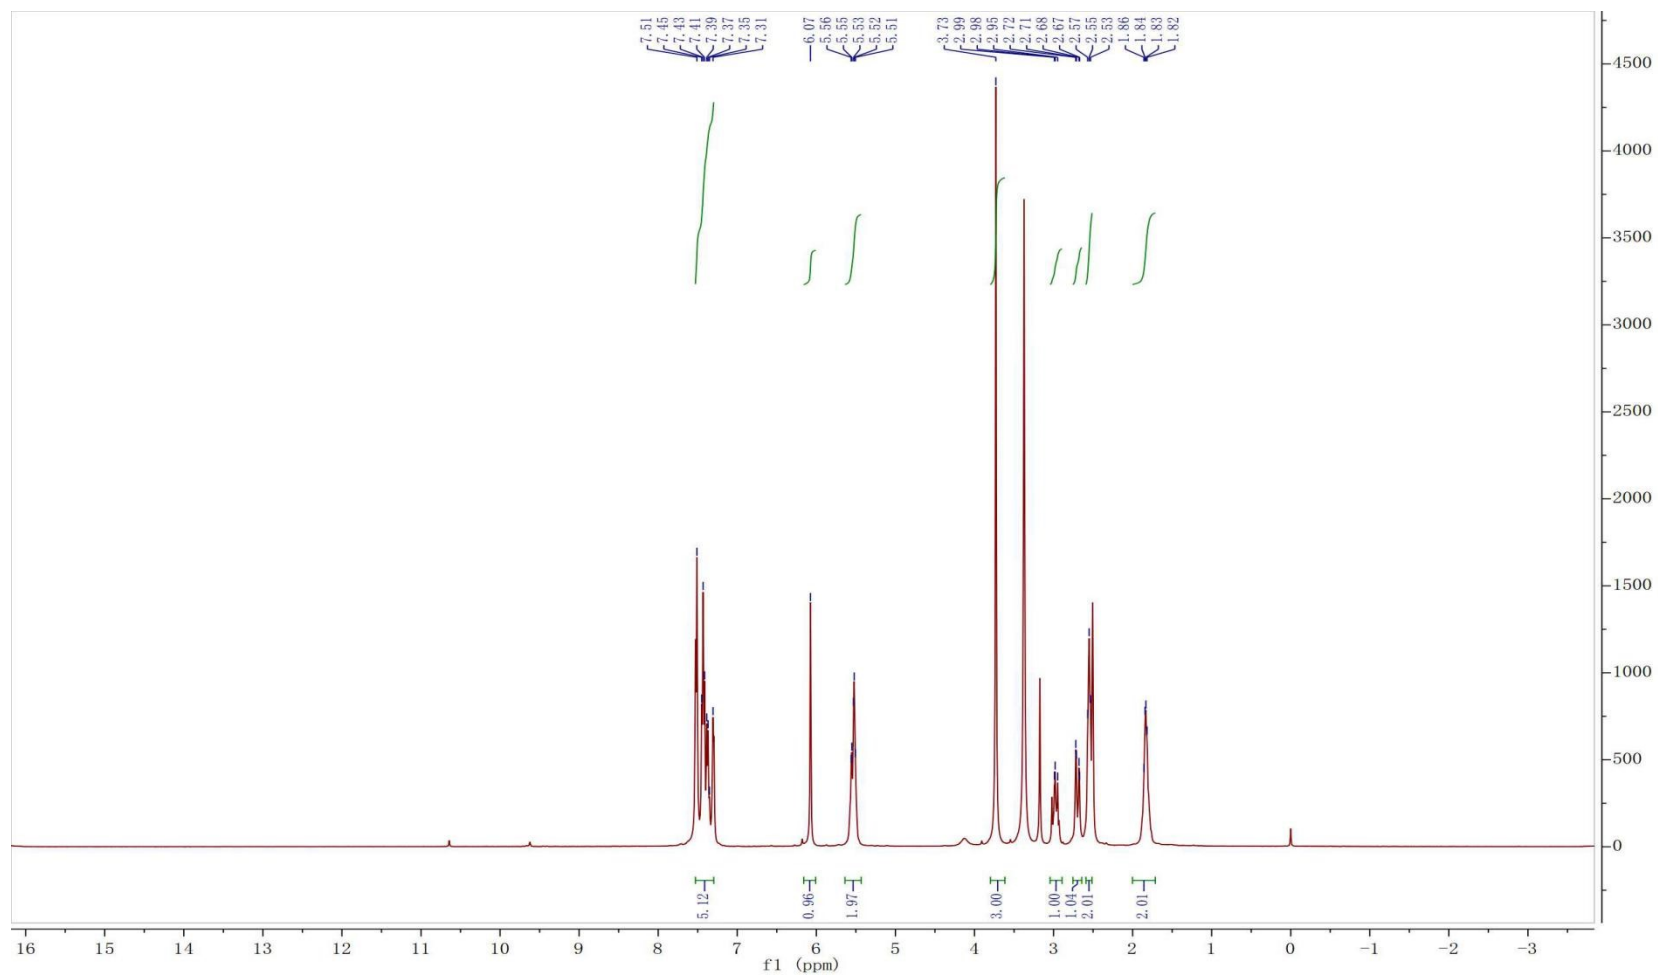

Fig. S4  $^{13}\text{C}$ -NMR spectrum of ALP-ACR

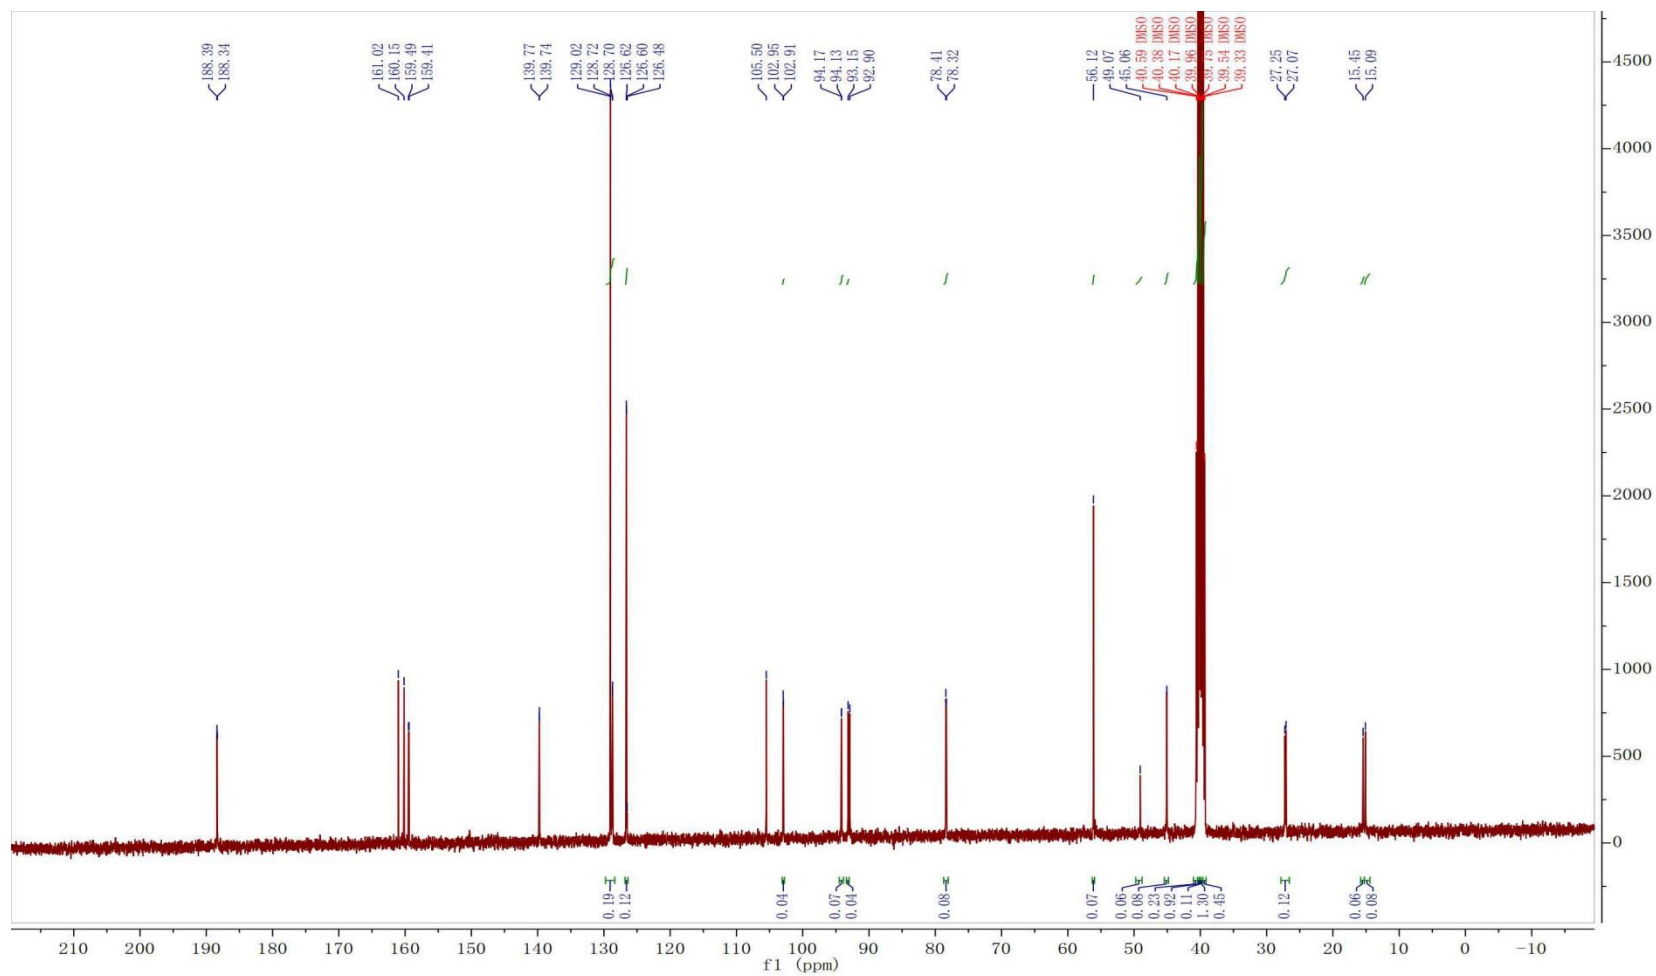

Fig. S5 HSQC-NMR spectrum of ALP-ACR

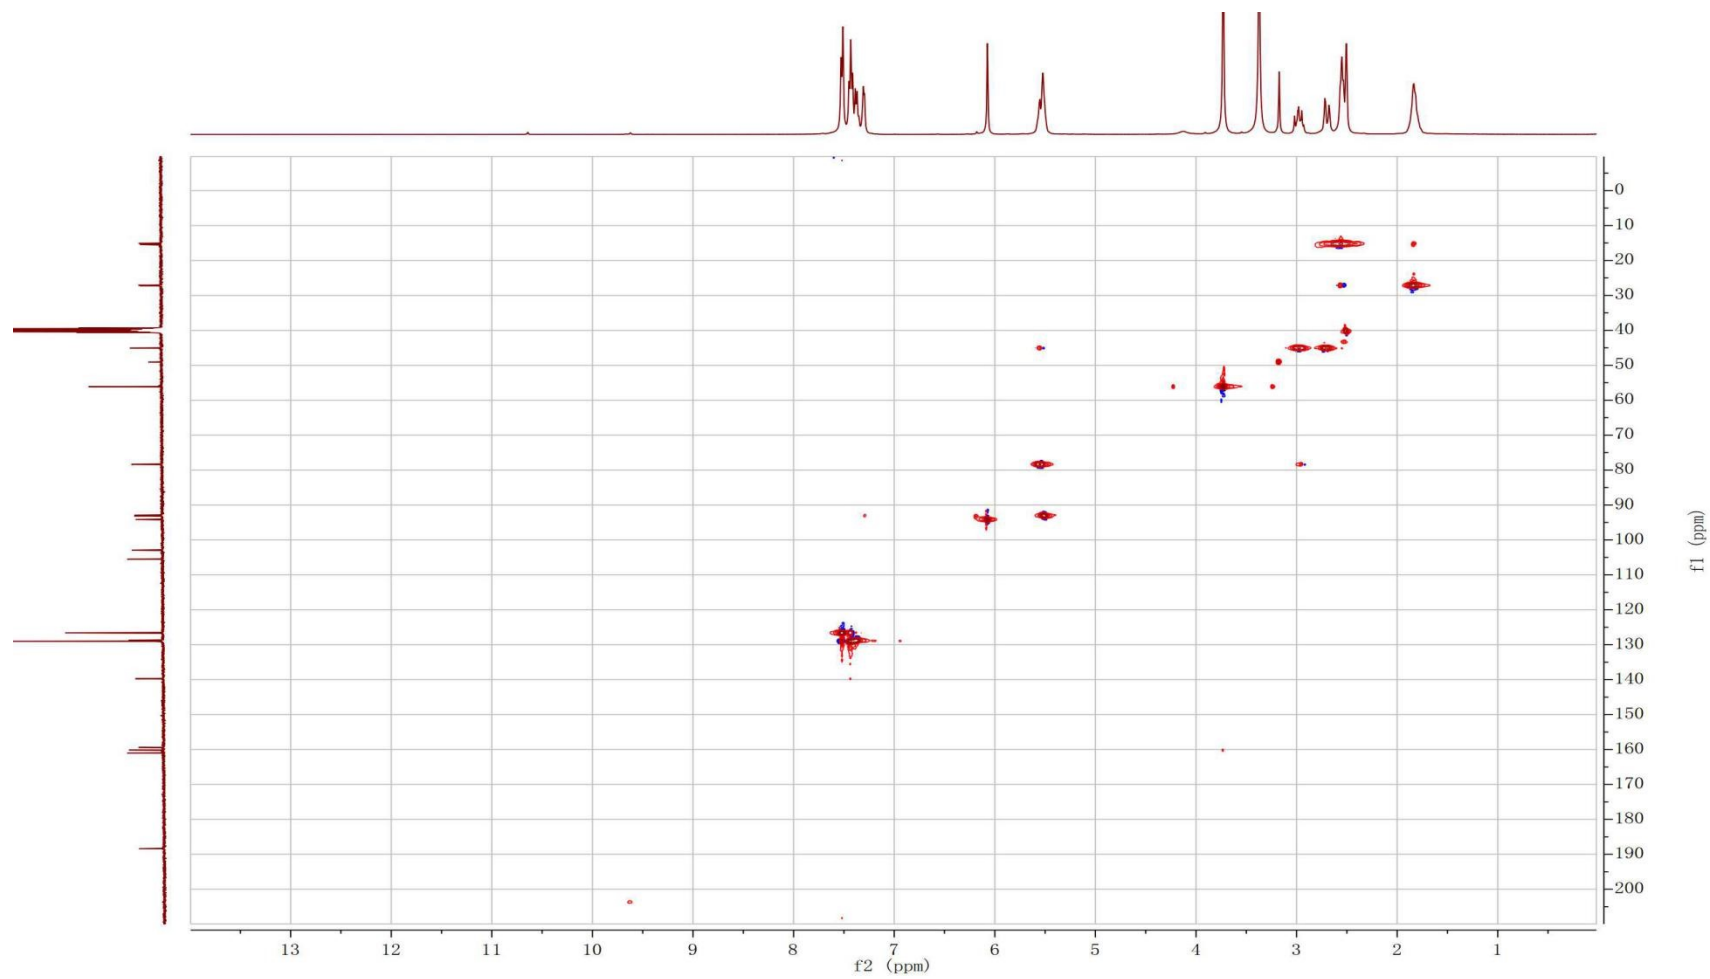

Fig. S6 HMBC-NMR spectrum of ALP-ACR

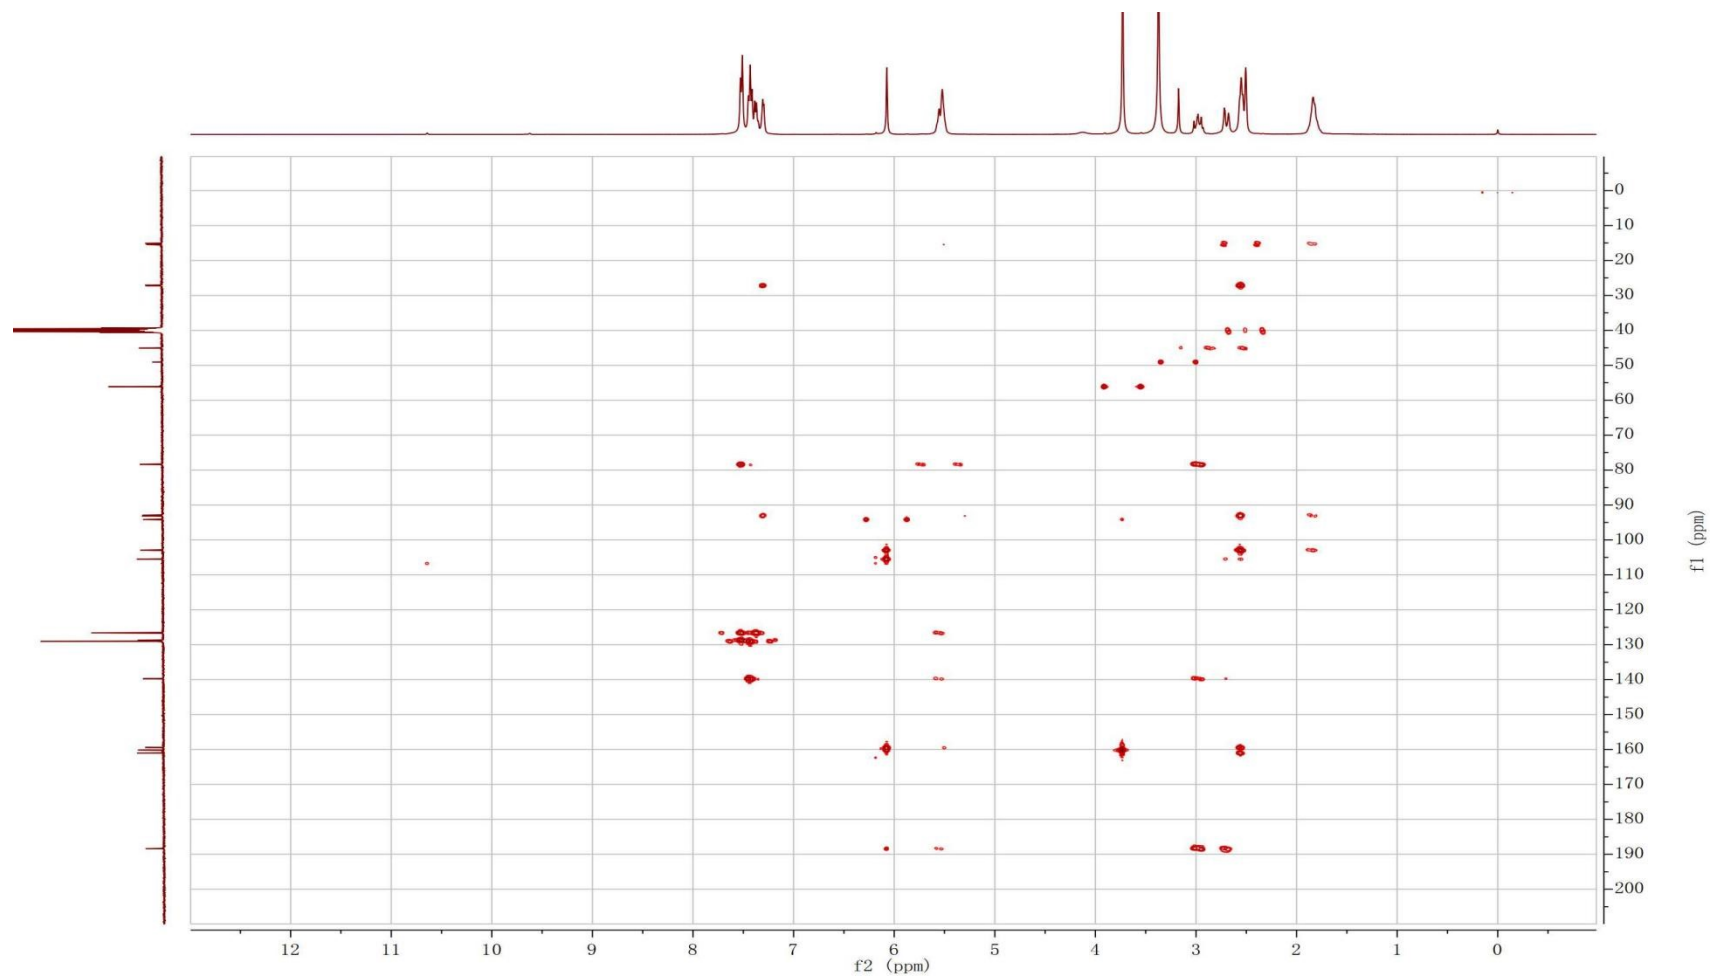

Fig. S7 High-resolution mass spectrum (MS<sup>1</sup> and MS<sup>2</sup>) of CAR-ACR-1

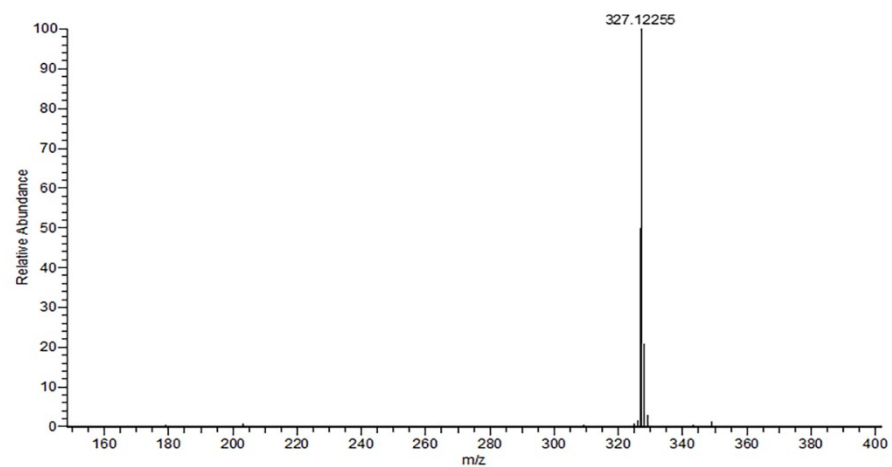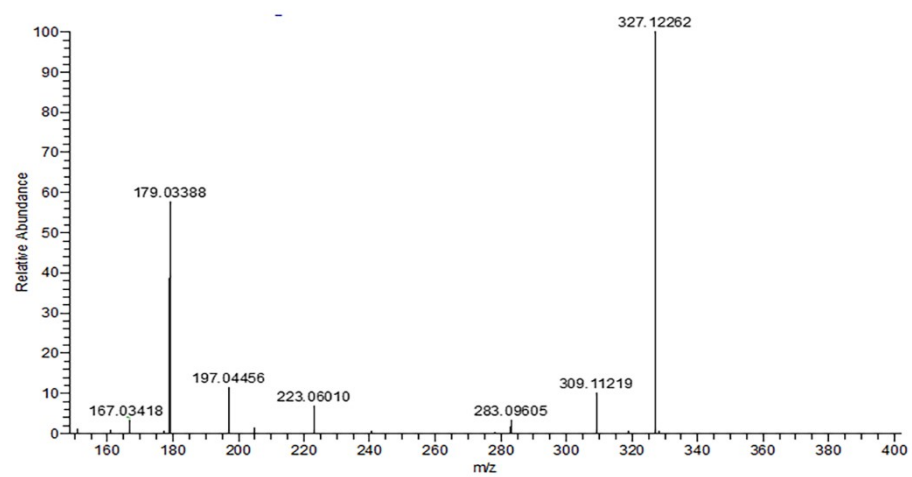

Fig. S8  $^1\text{H-NMR}$  spectrum of CAR-ACR-1

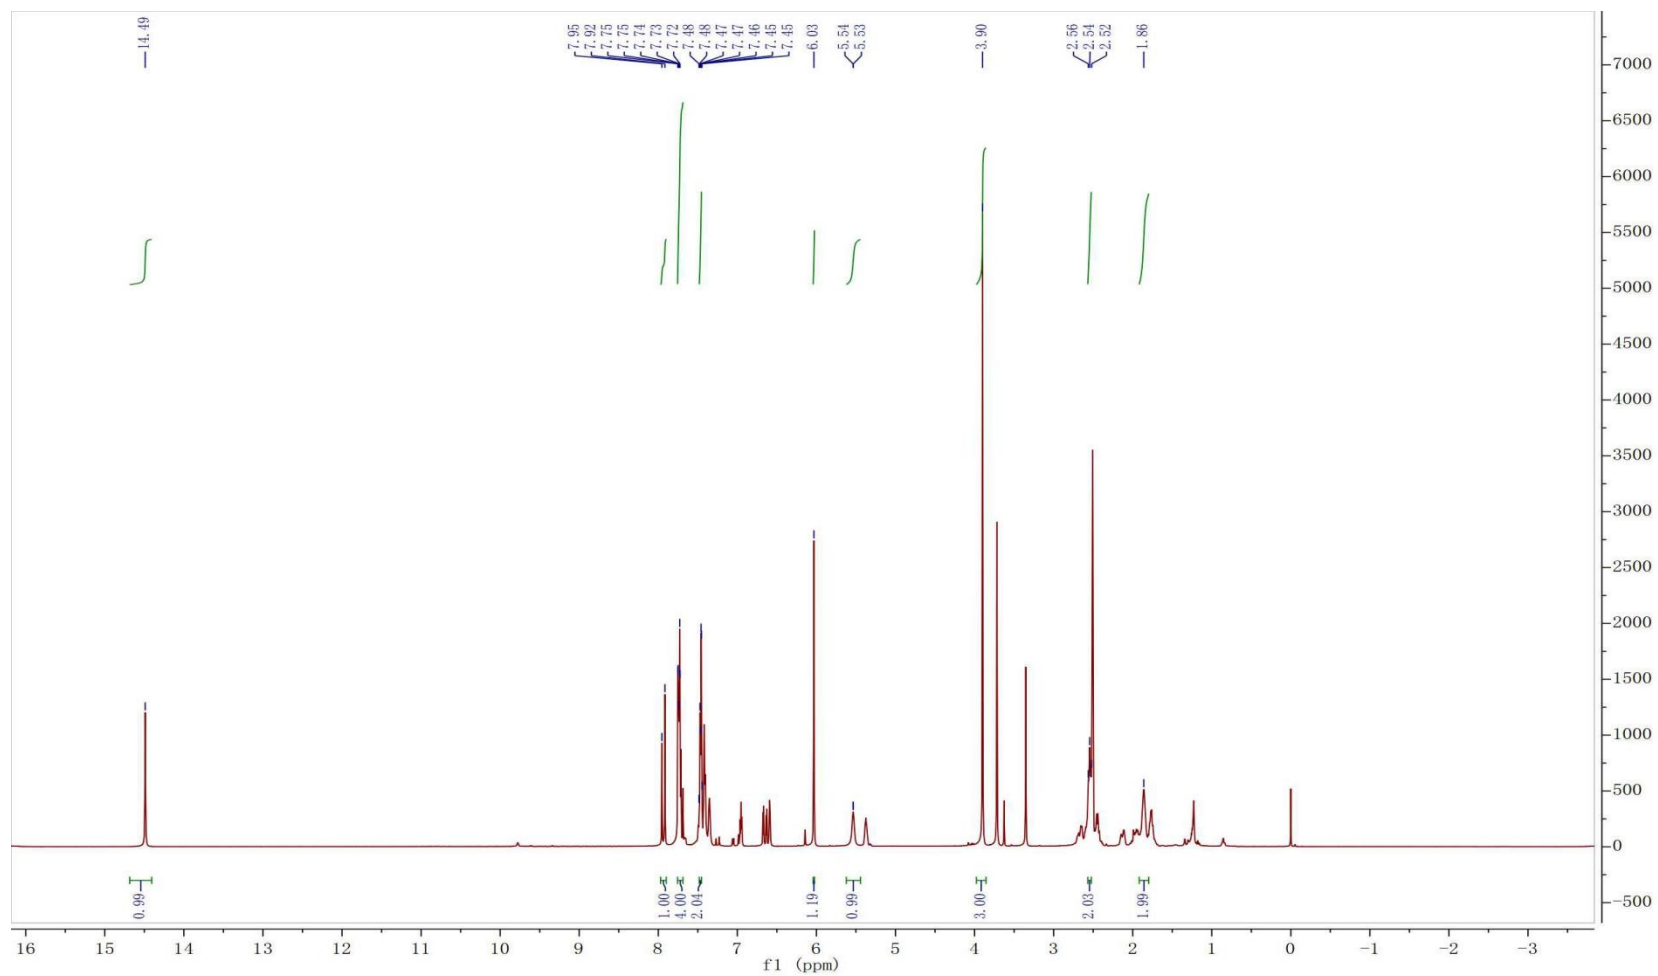

Fig. S9  $^{13}\text{C}$ -NMR spectrum of CAR-ACR-1

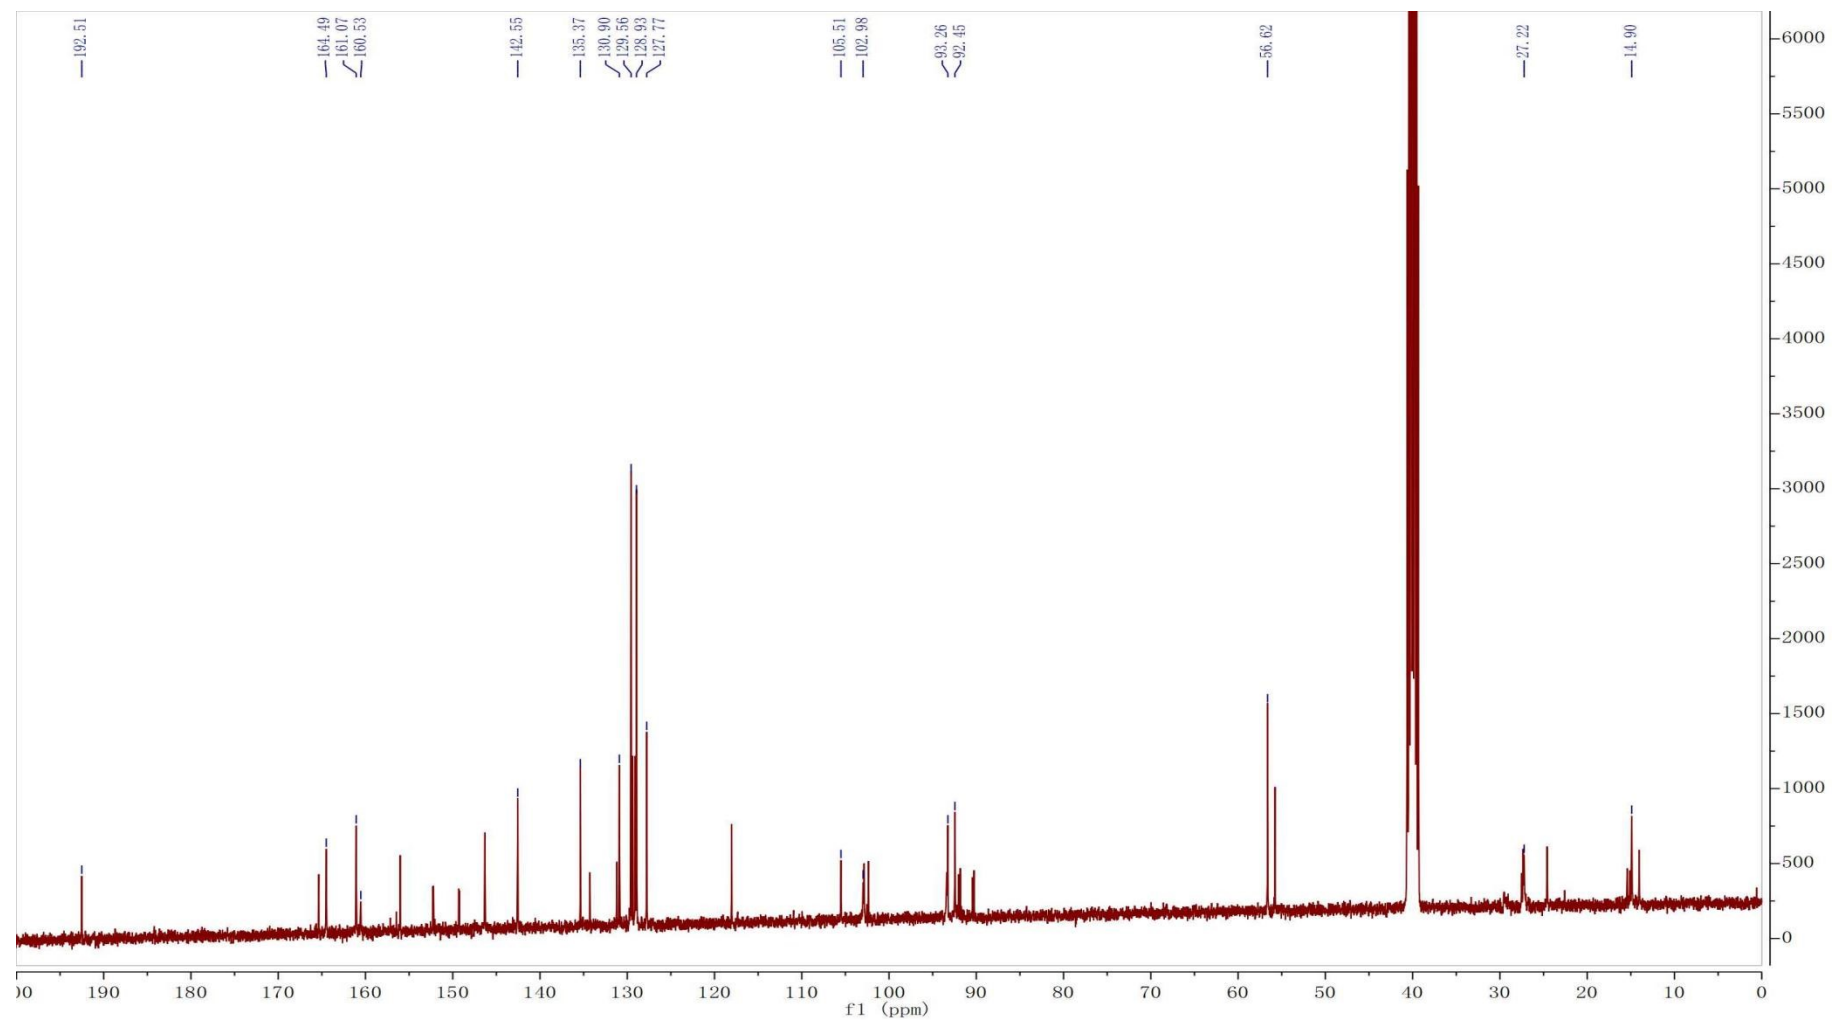



Fig. S10 HSQC-NMR spectrum of CAR-ACR-1

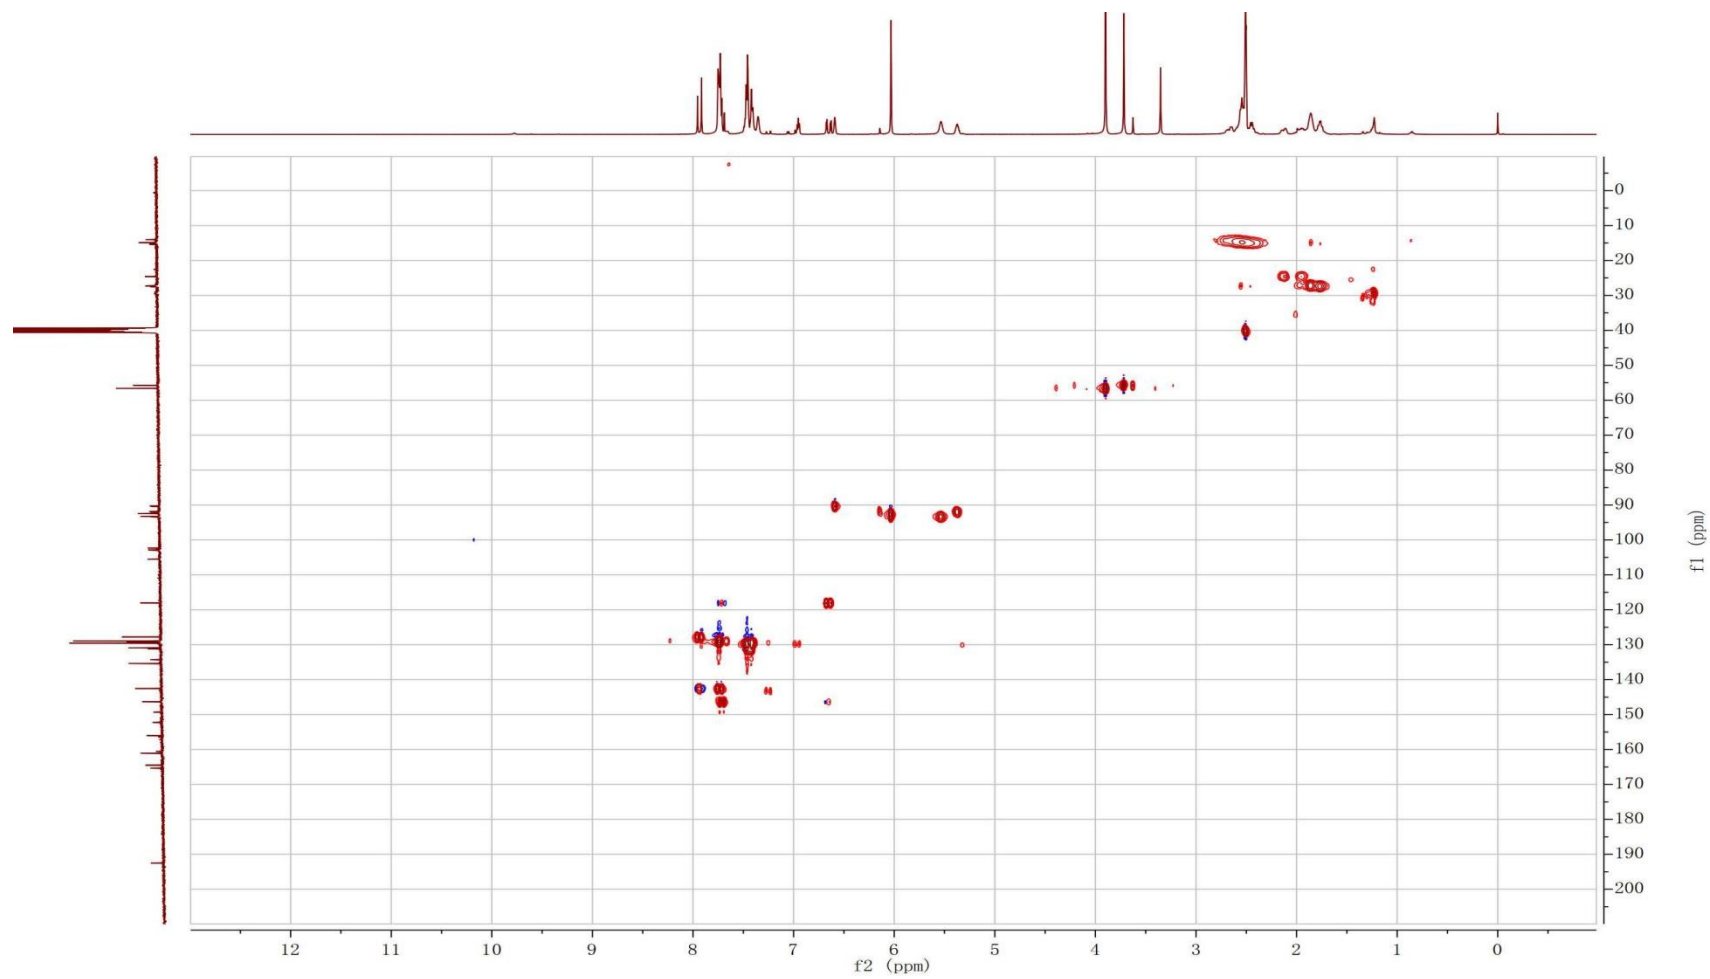

Fig. S11 HMBC-NMR spectrum of CAR-ACR-1

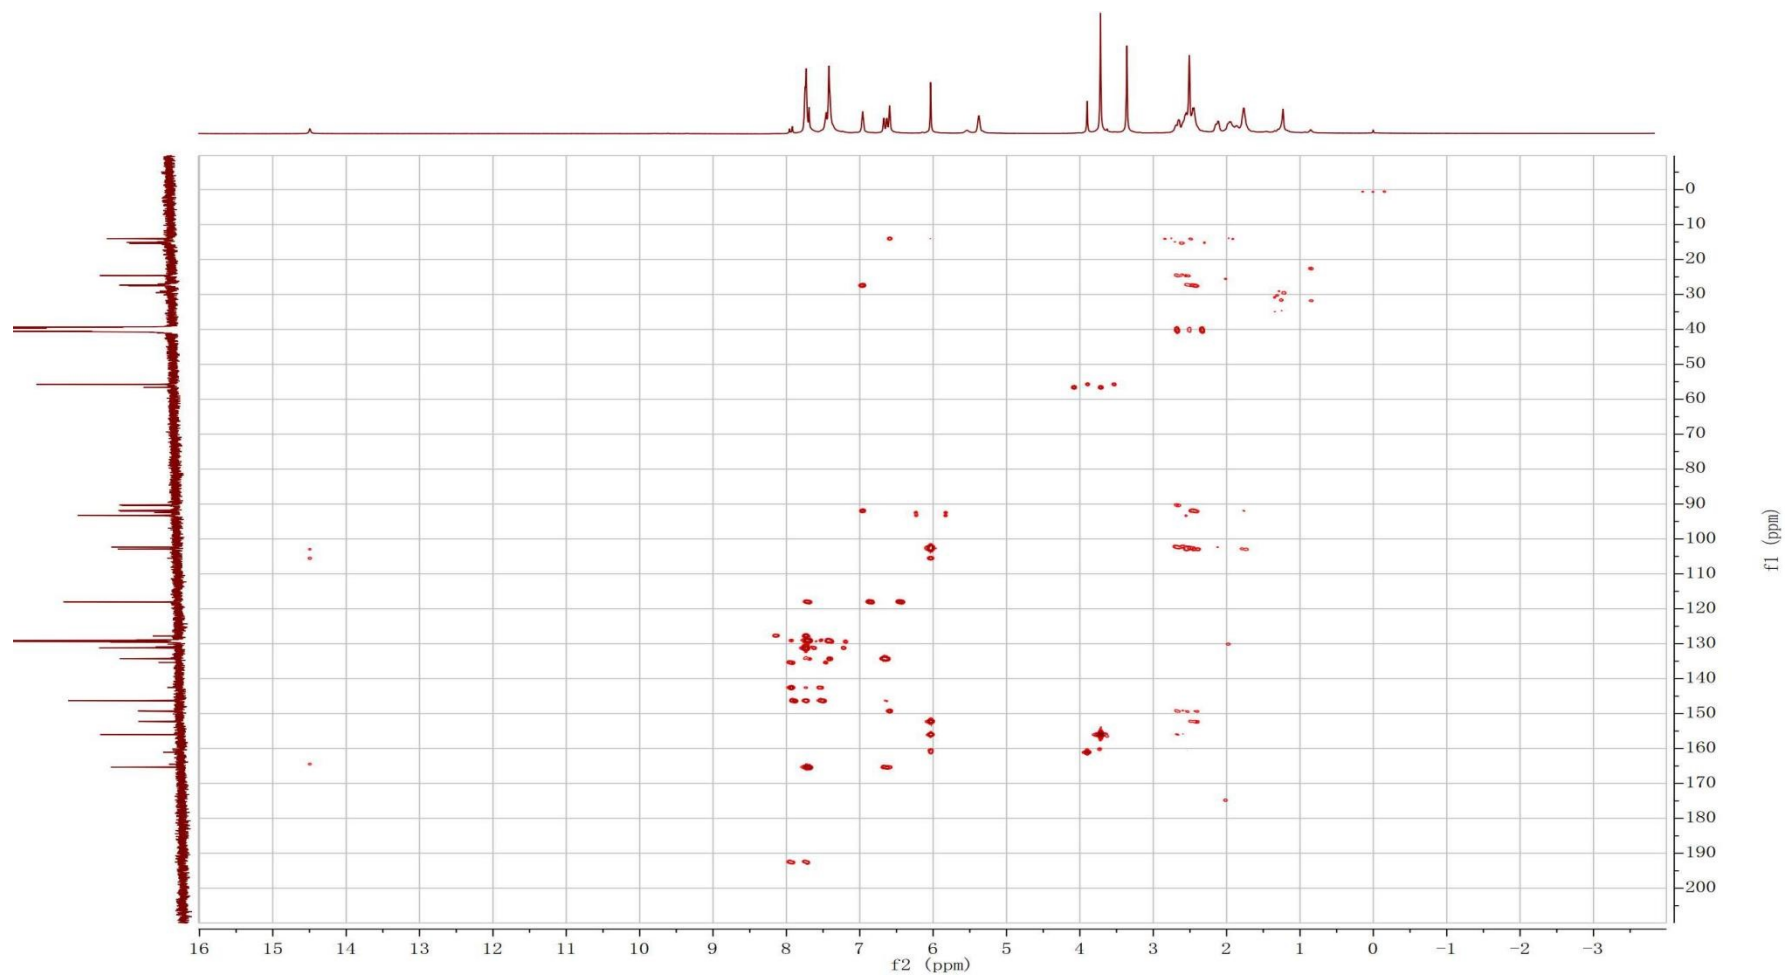

Fig. S12 High-resolution mass spectrum (MS<sup>1</sup> and MS<sup>2</sup>) of CAR-ACR-2

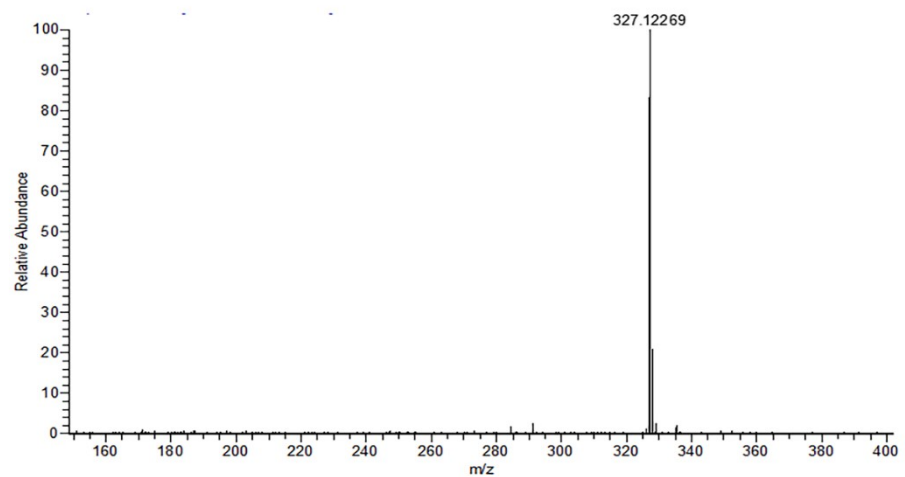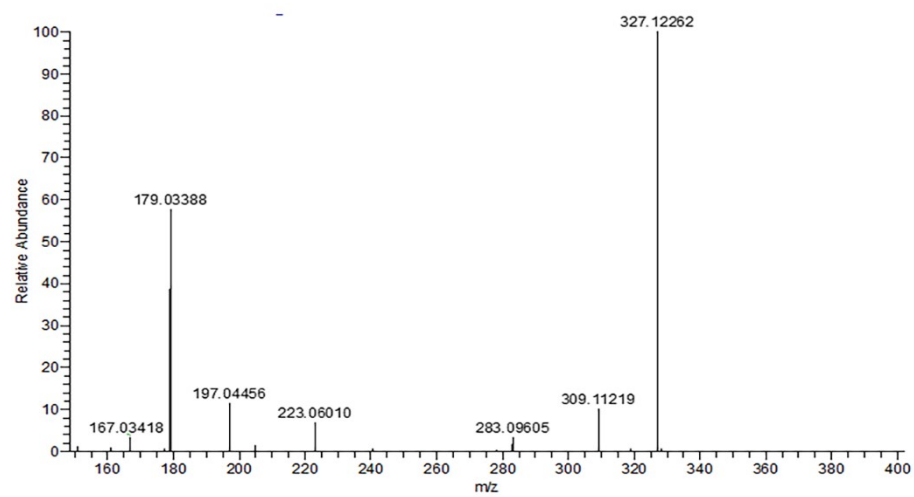

Fig. S13 <sup>1</sup>H-NMR spectrum of CAR-ACR-2

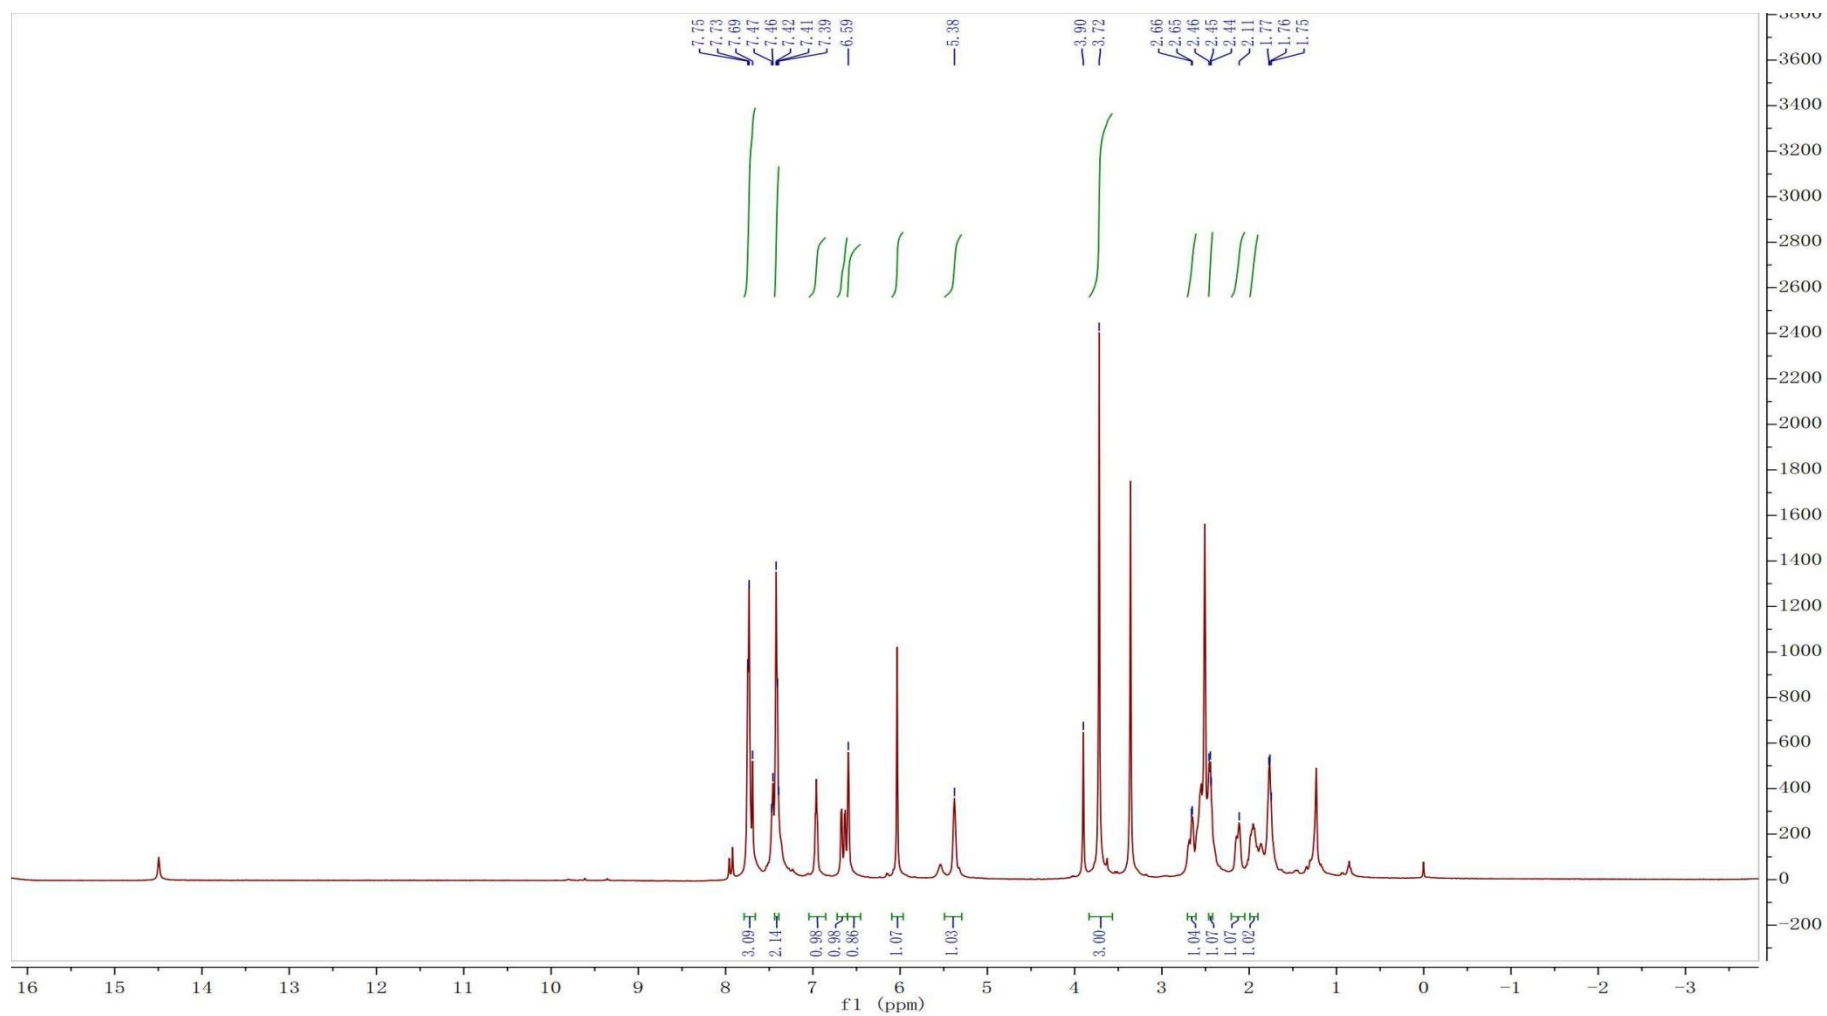

Fig. S14  $^{13}\text{C}$ -NMR spectrum of CAR-ACR-2

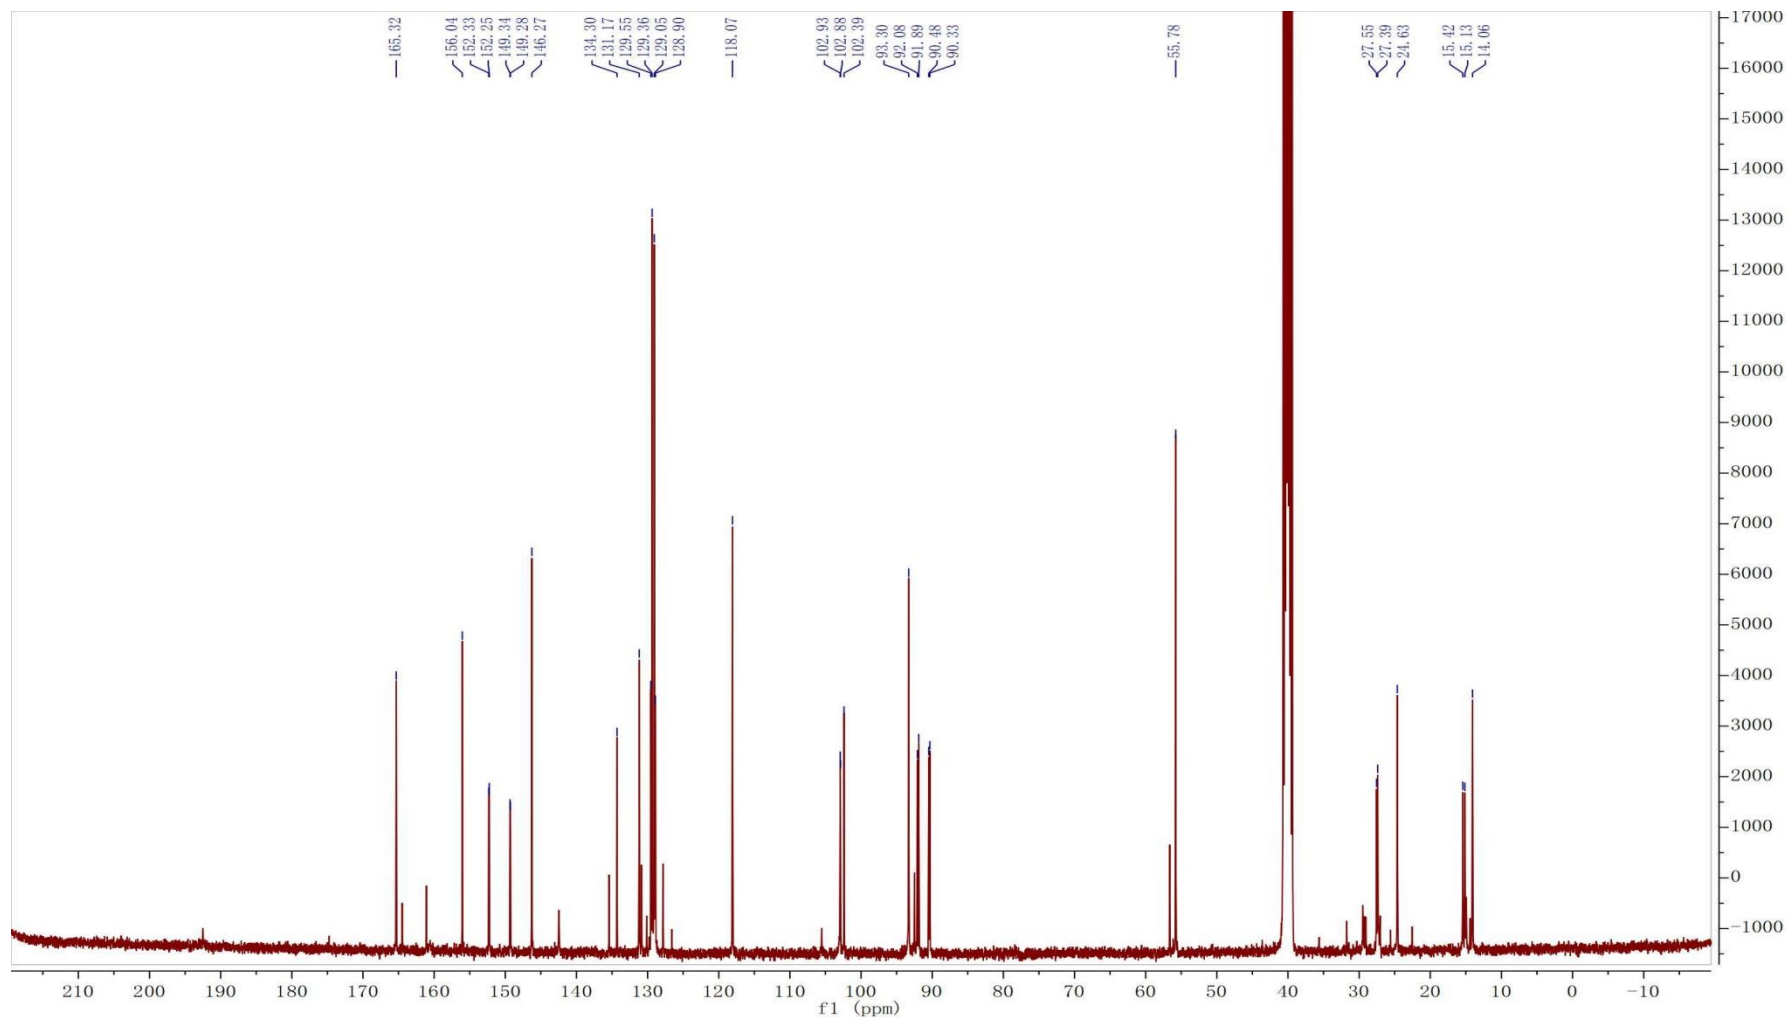

Fig. S15 HSQC-NMR spectrum of CAR-ACR-2

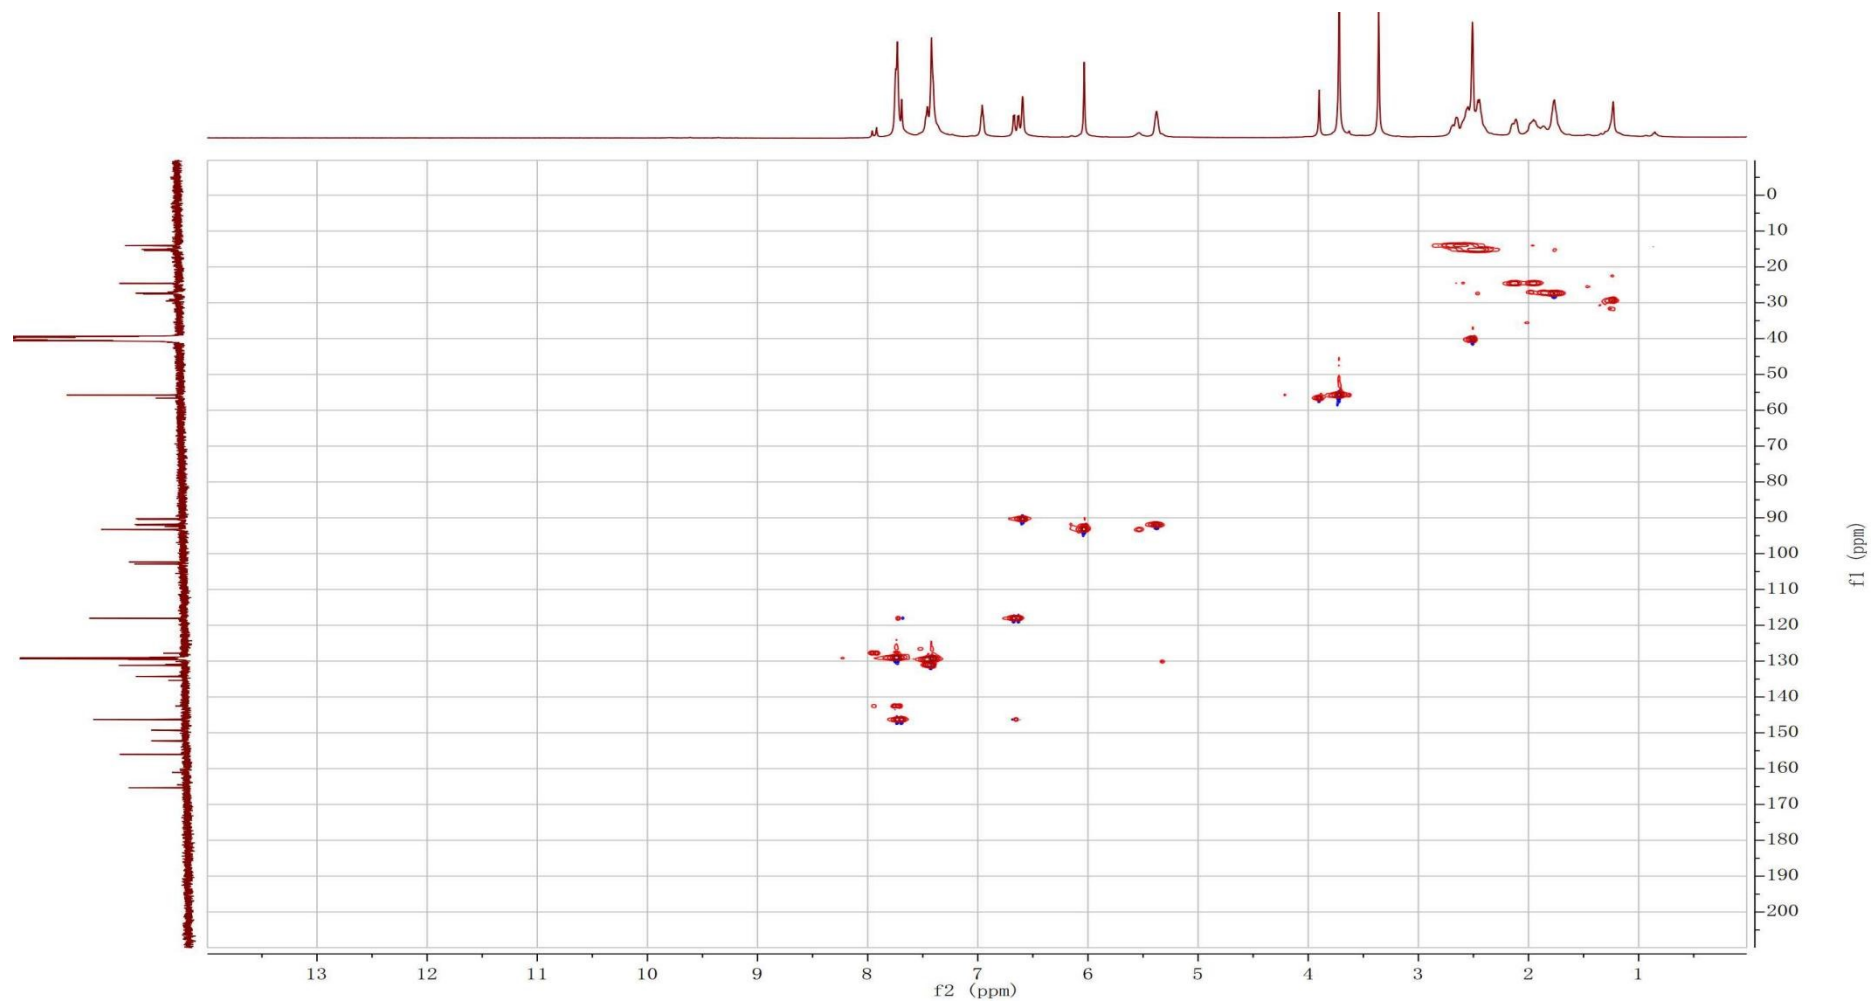

Fig. S16 HMBC-NMR spectrum of CAR-ACR-2

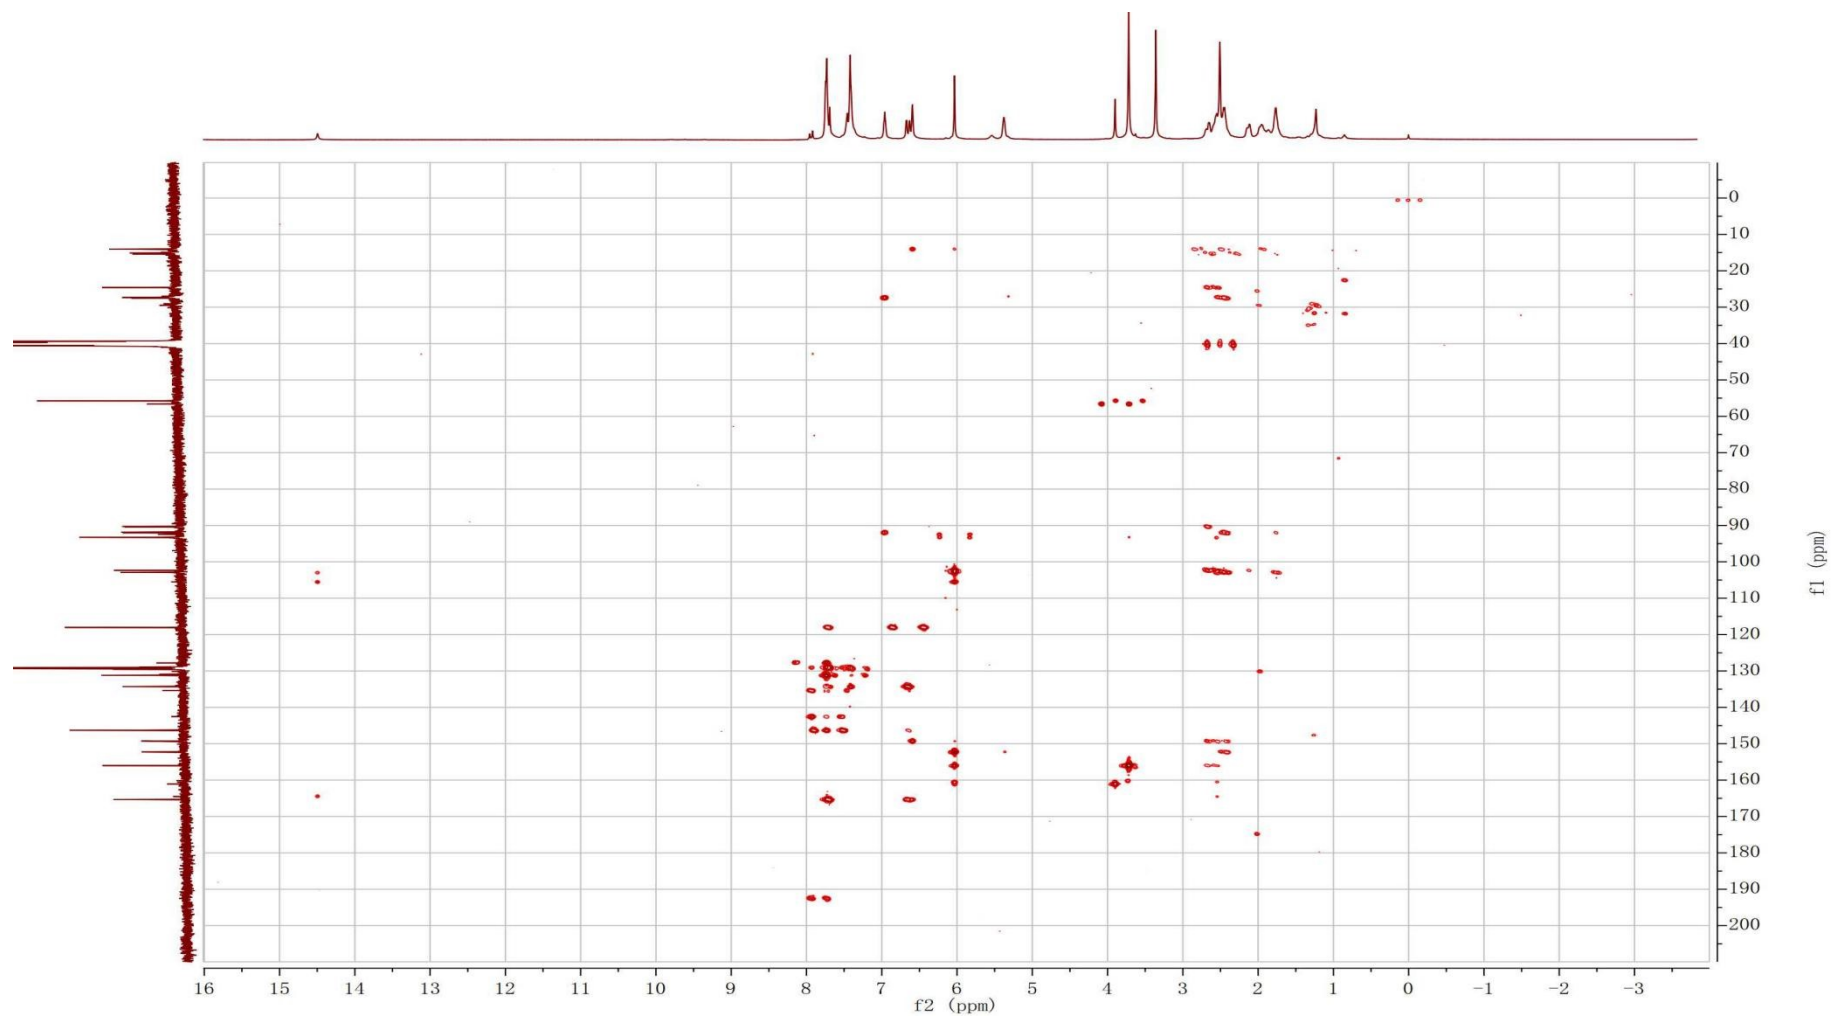

Fig. S17 DEPT-NMR spectrum of CAR-ACR-2

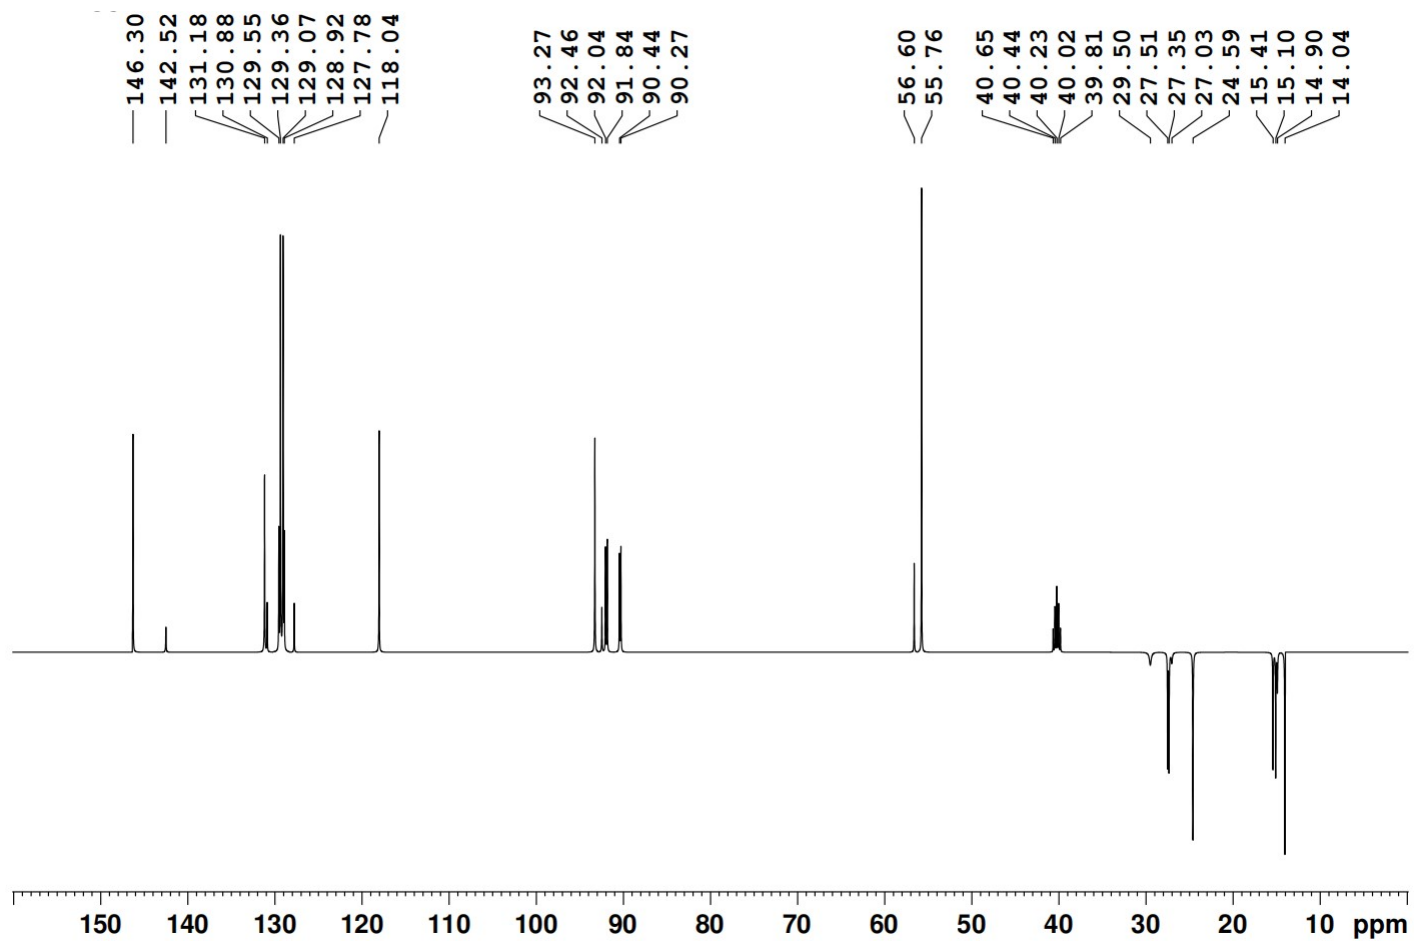



Fig. S18 HPLC-DAD chromatograms of (A) quercetin and (B) myricetin incubated at 100 °C for 0, 5, 15, 60 and 120 min in PBS (pH 7.0)

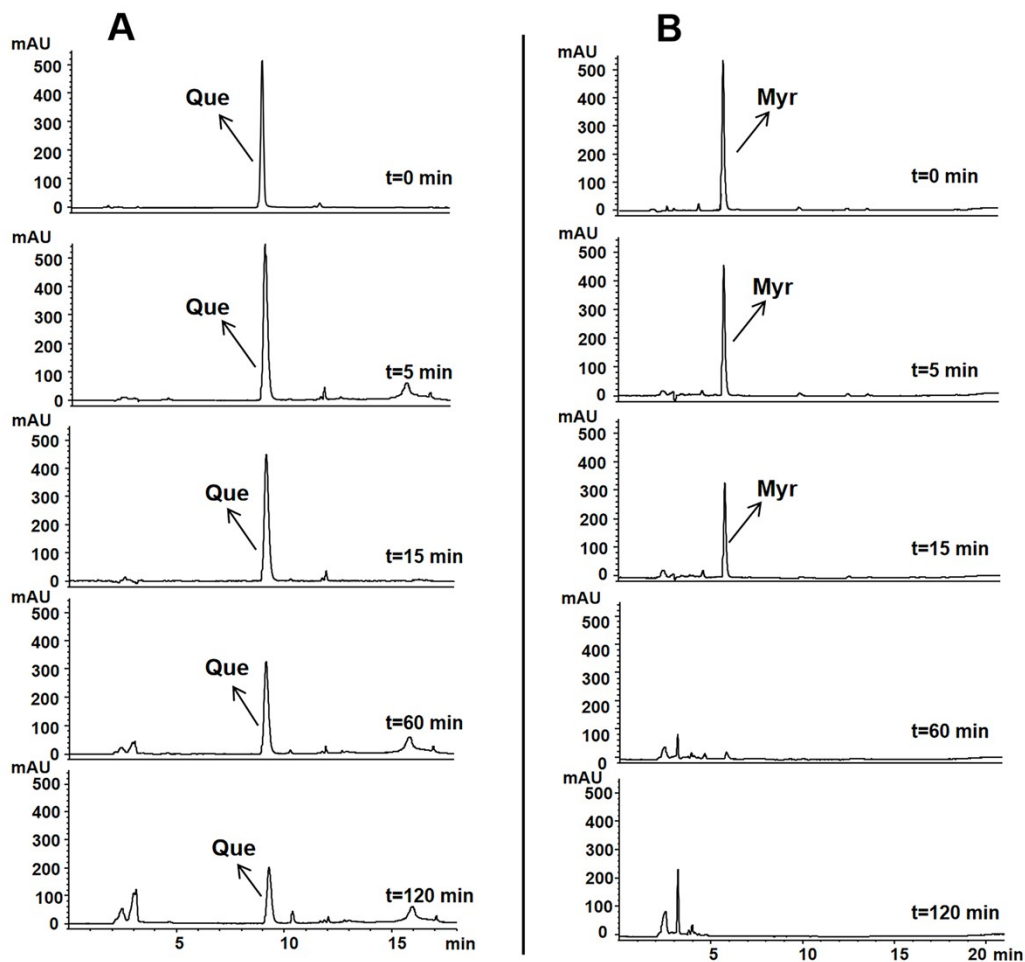

Fig. S19 HPLC-DAD chromatograms of (A) ALP-ACR and (B) CAR-ACR-1

incubated at 100 °C for 0, 5, 15, 60 and 120 min in PBS (pH 7.0).

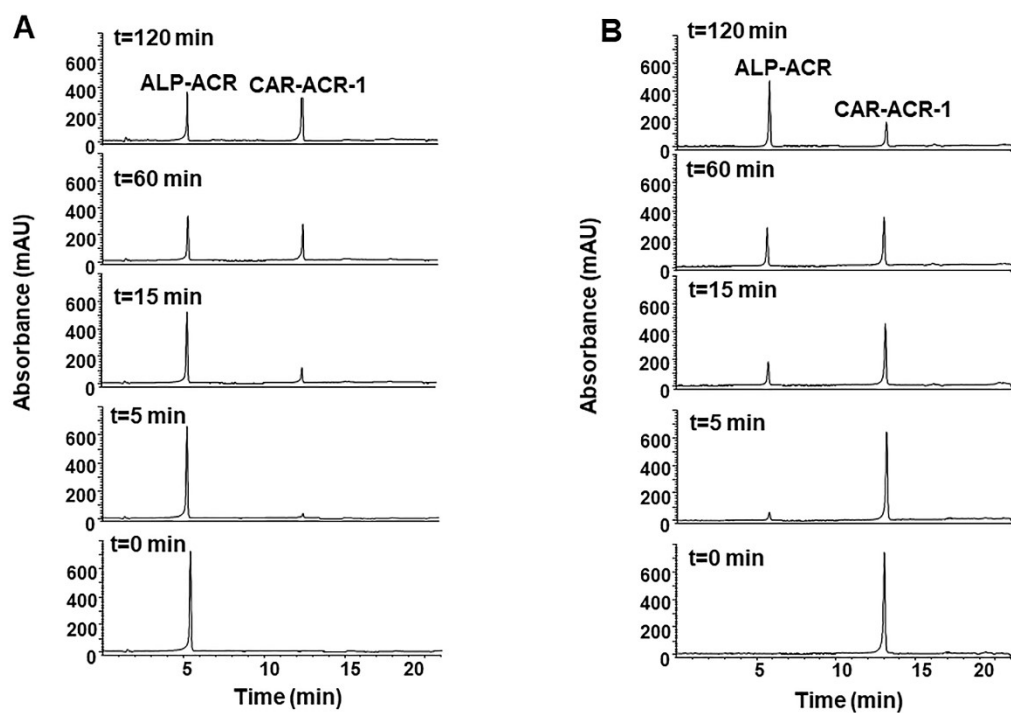

Supplement: d2fo00100d1.pdf [file d2fo00100d1.pdf]
